1 **Running head:** COVID-19 and Cognitive Impairment

2

3 **Cognitive impairment and functional change in COVID-19 patients**  
4 **undergoing inpatient rehabilitation**

5 Ruchi Patel MA OTR/L<sup>1</sup>, Irene Savrides MA OTR/L<sup>1</sup>, Christine Cahalan MS OTR/L<sup>1</sup>, Gargi  
6 Doulatani MA<sup>2</sup>, Michael W. O'Dell MD<sup>1,2</sup>, Joan Toglia PhD OTR/L<sup>1,2,4</sup>, & Abhishek Jaywant,  
7 PhD<sup>1,2,3</sup>

8 <sup>1</sup>Department of Rehabilitation Medicine, NewYork-Presbyterian Hospital/Weill Cornell Medical  
9 Center

10 <sup>2</sup>Department of Rehabilitation Medicine, Weill Cornell Medicine

11 <sup>3</sup>Department of Psychiatry, Weill Cornell Medicine

12 <sup>4</sup>School of Health and Natural Sciences, Mercy College

13

14 **Manuscript Word Count:** 1292 words

15

16 **Address Correspondence and Requests for Reprints to:**

17 Abhishek Jaywant, PhD

18 525 E 68<sup>th</sup> St, F-1232, New York NY 10065

19 Email: [abj2006@med.cornell.edu](mailto:abj2006@med.cornell.edu)

20 Tel: 857-225-5783

21

22 **Statement of Conflicts of Interest:** The authors have no relevant conflicts of interest to declare.

23

24 **Source of Funding:** The authors received no specific funding to complete this project. AJ  
25 receives salary support from a career development award from the National Institutes of Health  
26 via a subaward from Georgetown University (Grant Number: 1K12HD093427-04).

27

28

## Abstract

29 Cognitive impairment is increasingly recognized as a sequela of COVID-19. It is unknown how  
30 cognition changes and relates to functional gain during inpatient rehabilitation. We administered  
31 the Montreal Cognitive Assessment (MoCA) at admission to 77 patients undergoing inpatient  
32 rehabilitation for COVID-19 in a large U.S. academic medical center. 45 patients were  
33 administered the MoCA at discharge. Functional gain was assessed by change in the Quality  
34 Indicator for Self-Care (QI-SC). In the full sample, 80.5% of patients exhibited cognitive  
35 impairment on admission, which was associated with prior delirium. Among 45 patients with  
36 retest data, there were significant improvements in MoCA and QI-SC. QI-SC score gain was  
37 higher in patients who made clinically meaningful changes on the MoCA, an association that  
38 persisted after accounting for age and delirium history. Cognitive impairment is frequent among  
39 COVID-19 patients, but improves over time and is associated with functional gain during  
40 inpatient rehabilitation.

41 **Key Words:** Coronavirus, SARS-CoV-2, Cognition, Activities of Daily Living, Rehabilitation

## 42 **Introduction**

43 Cognitive impairment is increasingly recognized as a sequela of mild and severe COVID-  
44 19 infection(1–4). However, it is still unclear how cognitive impairment after COVID-19 evolves  
45 and relates to functional outcomes. Cognitive may improve in COVID-19 patients undergoing  
46 rehabilitation(5,6), but existing studies have not evaluated the association between cognitive  
47 change and functional gain, particularly in inpatient rehabilitation when early interventions can  
48 be implemented. Cognition is associated with functional gain in rehabilitation in other  
49 illnesses(7–9). Determining whether such an association exists in the inpatient rehabilitation  
50 phase after COVID-19 could provide additional targets for early treatment to optimize outcome.

51 The primary goal of the present study was to evaluate change in cognition and its relation  
52 to functional gain among COVID-19 patients undergoing inpatient rehabilitation. A secondary  
53 goal was to add to a growing body of literature that describes the frequency, severity, and  
54 predictors of cognitive impairment after COVID-19.

## 55 **Methods**

56 *Participants.* 94 patients with COVID-19 admitted to an inpatient rehabilitation unit in a  
57 United States medical center from March-August 2020. Patients were medically stable and able  
58 to tolerate 3 hours/day of occupational, physical, and speech-language therapy.

59 Seventeen patients were not administered our cognitive measure because (1) they were  
60 admitted prior to knowledge of COVID-19-related cognitive deficits and the implementation of  
61 our screening protocol; (2) clinicians deemed it could not be reliably administered due to  
62 language barriers; or (3) clinicians deemed patients were cognitively intact.

63 Data were extracted from retrospective chart reviews under approval of the Weill Cornell  
64 Medicine Institutional Review Board. 19/77 patients underwent a separate neuropsychological  
65 evaluation during their admission, the results of which have been published<sup>5</sup>; the results  
66 described here are novel.

67 *Outcome Measures.* We extracted included age, gender (male or female), prior level of  
68 function (independent or not), intubation history (yes or no) and length (in days), delirium  
69 history (yes or no), and inpatient rehabilitation and acute hospitalization lengths of stay (Table  
70 1).

71 The MoCA (10) was administered within 72 hours of admission to inpatient  
72 rehabilitation. Scores on the MoCA range from 0-30 and ranges indicate  $\geq 26$ =normal, 18-  
73 25=mild impairment, 11-17=moderate impairment, and  $\leq 10$ =severe impairment. The minimal  
74 clinical important difference (MCID) of 3 points was used(11). Three patients received the Blind  
75 MoCA, which was converted to 30-point scale per established guidelines. Discharge MoCA was  
76 administered to 45/77 patients. 32 patients did not receive a discharge MoCA as they either  
77 scored normal on the initial assessment, were unavailable, and/or declined.

78 The Quality Indicator for Self-Care (QI-SC) (12) is a standard functional assessment in  
79 the United States. Items scored on a scale of 1 to 6 include eating, grooming, toileting, bathing,  
80 upper body dressing, lower body dressing, and donning/doffing footwear. Total score ranges  
81 from 7 (total assistance) to 42 (independent). Occupational therapists assigned admission and  
82 discharge QI-SC scores to all patients.

83 *Statistical Analyses.* We used descriptive statistics to describe the frequency of cognitive  
84 impairment. We used independent and paired-samples t-tests with effect sizes (Cohen's d), and

85 Spearman rank-order correlations, to evaluate associations between clinical characteristics and  
86 admission MoCA, change in MoCA and QI-SC from admission to discharge, and QI-SC change  
87 in patients who met or did not meet the MoCA MCID. To adjust for age and to account for the  
88 effect of multiple variables, we used multivariable linear regression models.

89

## 90 **Results**

91 Table 1 provides demographic and clinical data. Patients with discharge MoCA scores  
92 (n=45) did not differ from those who were not administered the MoCA at discharge (n=32) in  
93 age, gender, prior neurologic history, prior delirium, prior intubation, or prior hypoxia (all  
94  $p$ 's>.05).

95 *Cognitive Impairment at Admission to Rehabilitation.* 62/77 patients (80.5%)  
96 demonstrated cognitive deficits on the MoCA at admission: 39/77 (51%) had mild deficits, 20/77  
97 (26%) had moderate deficits, and 3/77 (4%) had severe deficits.

98 *Correlates of Cognitive Impairment at Admission to Rehabilitation.* Admission MoCA  
99 scores were lower for patients who previously had delirium (Mean Difference=3.08, 95% CI:  
100 .58-5.58,  $t=2.45$ ,  $p=.02$ ,  $d=.58$ ). Admission MoCA scores were not correlated with age ( $r_s=-.15$ ,  
101  $p=.19$ ), length of intubation ( $r_s = -.04$ ,  $p=.72$ ), or acute hospitalization length of stay ( $r_s=-.08$   
102  $p=.50$ ). In a multivariable linear regression predicting admission MoCA from age, history of  
103 delirium, length of intubation, and length of acute care hospitalization, the overall model was  
104 significant ( $R^2=.13$ ,  $F=2.53$ ,  $p=.049$ ). Among predictors, only history of delirium had a  
105 significant association with admission MoCA ( $\beta=-3.67$ ,  $t=2.35$ ,  $p=.02$ ).

106            *Change in Cognition and Association with Functional Gain.* The 45 patients with  
107 admission and discharge MoCA scores improved on the MoCA (Mean Difference=4.02, 95% CI:  
108 2.92-5.13,  $t=7.35$ ,  $p<.001$ ,  $d=1.10$ ) and QI-SC (Mean Difference=12.16, 95% CI: 10.3-14.01,  
109  $t=13.19$ ,  $p<.001$ ,  $d=1.97$ ) (Figure 1). 32/45 patients (71%) met the MoCA MCID. There was a  
110 greater increase in QI-SC scores in patients who met the MoCA MCID than those who did not  
111 (Mean Difference=4.41, 95% CI: 0.49-8.34,  $t=2.27$ ,  $p=.03$ ,  $d=0.75$ ; Figure 2). To evaluate the  
112 robustness of this association, we conducted a multivariable linear regression with the outcome  
113 of QI-SC score change and predictors of MoCA MCID (met or did not meet/declined), age, and  
114 history of delirium. While the overall model was not statistically significant ( $R^2=.13$ ,  $F=2.03$ ,  
115  $p=.125$ ), among individual predictors, improvement by the MoCA MCID continued to have a  
116 significant association with QI-SC score change ( $\beta=4.74$ ,  $t=2.31$ ,  $p=.03$ ) after adjusting for age  
117 and history of delirium. Despite overall improvement, at discharge, 35/45 (78%) continued to  
118 exhibit cognitive impairment on the MoCA.

119

## 120 **Discussion**

121            Our main findings are (1) cognitive impairment is common in COVID-19 patients  
122 undergoing inpatient rehabilitation and associated with a history of delirium; (2) cognition and  
123 function (self-care) improves significantly during inpatient rehabilitation; and (3) clinically  
124 meaningful gains in cognition are associated with improved functional gains.

125            COVID-19 patients exhibited significant improvement in cognition with a large effect  
126 size. Cognitive improvement over time may reflect natural recovery, improvement in residual  
127 effects of prior delirium, and/or rehabilitation intervention effects. Our results indicate that

128 cognition evolves after COVID-19 and suggests that it may be beneficial to implement cognitive  
129 interventions to facilitate functional recovery(5). Despite recovery, a majority of our sample  
130 continued to demonstrate cognitive impairment at discharge from inpatient rehabilitation,  
131 highlighting the importance of continued management of cognition post-discharge(6).

132 COVID-19 patients also experienced a significant improvement in their functional self-  
133 care skills. Notably, significantly greater functional improvement was seen in patients who  
134 exhibited a clinically meaningful improvement in cognition. Although we cannot make causal  
135 conclusions, these findings suggest that addressing cognitive impairment after COVID-19 may  
136 improve functional outcomes.

137 Consistent with prior research, we replicate findings of a high frequency of cognitive  
138 impairment, predominantly mild impairment, in recovering COVID-19 patients. Also consistent  
139 with the literature on the negative consequences of delirium after COVID-19(13–15), delirium  
140 during acute hospitalization was associated with greater cognitive impairment at admission to  
141 rehabilitation. This emphasizes the potential importance of early detection and management of  
142 delirium after COVID-19.

143 Among limitations of this study, discharge cognitive data were not available for 32/77  
144 patients, which may have biased findings. However, there were no demographic or clinical  
145 differences between the 45 patients with and 32 patients without discharge cognitive data.  
146 Missing data highlight challenges of administering objective cognitive assessments in an acute  
147 inpatient setting, particularly during a time in which the cognitive sequelae of COVID-19 were  
148 relatively unknown and hospital policies and procedures were rapidly evolving at the initial  
149 surge of the pandemic. Prospective longitudinal research is necessary to estimate the true  
150 prevalence of cognitive dysfunction, its evolution post-hospitalization, and to ascertain

151 etiological mechanisms. Our sample comprised a relatively sick group of patients from the first  
152 wave of COVID-19; findings may not apply to milder disease presentations or from subsequent  
153 waves of illness.

154



155 **Acknowledgements:** We thank the staff of the IRU for assisting in cognitive and functional  
156 assessments, and for caring for, our COVID-19 patients.

157

## 158 **References**

- 159 1. Jaywant A, Vanderlind WM, Alexopoulos GS, Fridman CB, Perlis RH, Gunning FM.  
160 Frequency and profile of objective cognitive deficits in hospitalized patients recovering  
161 from COVID-19. *Neuropsychopharmacology*. 2021;1–6.
- 162 2. Del Brutto OH, Wu S, Mera RM, Costa AF, Recalde BY, Issa NP. Cognitive decline  
163 among individuals with history of mild symptomatic SARS-CoV-2 infection: A  
164 longitudinal prospective study nested to a population cohort. *Eur J Neurol*.  
165 2021;(November 2020):1–9.
- 166 3. Beaud V, Crottaz-Herbette S, Dunet V, Vaucher J, Bernard-Valnet R, Du Pasquier R, et  
167 al. Pattern of cognitive deficits in severe COVID-19. *J Neurol Neurosurg Psychiatry*.  
168 2021;92(5):567–8.
- 169 4. Baker HA, Safavynia SA, Evered LA. The ‘third wave’: impending cognitive and  
170 functional decline in COVID-19 survivors. *Br J Anaesth [Internet]*. 2021;126(1):44–7.  
171 Available from: <https://doi.org/10.1016/j.bja.2020.09.045>
- 172 5. Daynes E, Gerlis C, Chaplin E, Gardiner N, Singh SJ. Early experiences of rehabilitation  
173 for patients post-COVID to improve fatigue, breathlessness exercise capacity and  
174 cognition. *Chron Respir Dis [Internet]*. 2021;18:1–4. Available from:  
175 <http://medrxiv.org/content/early/2021/03/28/2021.03.25.21254293.abstract>

- 176 6. Alemanno F, Houdayer E, Parma A, Spina A, Del Forno A, Scatolini A, et al. COVID-19  
177 cognitive deficits after respiratory assistance in the subacute phase: A COVID  
178 rehabilitation unit experience. *PLoS One* [Internet]. 2021;16(2 February):1–12. Available  
179 from: <http://dx.doi.org/10.1371/journal.pone.0246590>
- 180 7. Jaywant A, Togliola J, Gunning FM, O’Dell MW. Subgroups Defined by the Montreal  
181 Cognitive Assessment Differ in Functional Gain During Acute Inpatient Stroke  
182 Rehabilitation. *Arch Phys Med Rehabil* [Internet]. 2020;101(2):220–6. Available from:  
183 <https://doi.org/10.1016/j.apmr.2019.08.474>
- 184 8. Dutzi I, Schwenk M, Kirchner M, Bauer JM, Hauer K. Cognitive change in rehabilitation  
185 patients with dementia: prevalence and association with rehabilitation success. *J*  
186 *Alzheimer’s Dis*. 2017;60(3):1171–82.
- 187 9. Bajorek AJ, Slocum C, Goldstein R, Mix J, Niewczyk P, Ryan CM, et al. Impact of  
188 Cognition on Burn Inpatient Rehabilitation Outcomes. *PM&R*. 2017;9(1):1–7.
- 189 10. Nasreddine Z, Phillips N, Bédirian V, Charbonneau S, Whitehead V, Collin I, et al. The  
190 Montreal Cognitive Assessment, MoCA: a brief screening tool for mild cognitive  
191 impairment. *J Am Geriatr Soc* [Internet]. 2005;53(4):695–9. Available from:  
192 <http://onlinelibrary.wiley.com/doi/10.1111/j.1532-5415.2005.53221.x/full>
- 193 11. Wu CY, Hung SJ, Lin KC, Chen KH, Chen P, Tsay PK. Responsiveness, Minimal  
194 Clinically Important Difference, and Validity of the MoCA in Stroke Rehabilitation.  
195 *Occup Ther Int*. 2019;2019:2517658.
- 196 12. Pardasaney PK, Deutsch A, Iriondo-Perez J, Ingber MJ, McMullen T. Measuring Inpatient  
197 Rehabilitation Facility Quality of Care: Discharge Self-Care Functional Status Quality

- 198 Measure. Arch Phys Med Rehabil [Internet]. 2018;99(6):1035–41. Available from:  
199 <https://doi.org/10.1016/j.apmr.2017.02.023>
- 200 13. Helms J, Kremer S, Merdji H, Schenck M, Severac F, Clere-Jehl R, et al. Delirium and  
201 encephalopathy in severe COVID-19: A cohort analysis of ICU patients. Crit Care.  
202 2020;24(491):1–11.
- 203 14. Mendes A, Herrmann FR, Périvier S, Gold G, Graf CE, Zekry D. Delirium in Older  
204 Patients With COVID-19: Prevalence, Risk Factors, and Clinical Relevance. J Gerontol A  
205 Biol Sci Med Sci. 2021;1–5.
- 206 15. Taquet M, Geddes JR, Husain M, Luciano S, Harrison PJ. 6-month neurological and  
207 psychiatric outcomes in 236–379 survivors of COVID-19: a retrospective cohort study  
208 using electronic health records. The lancet Psychiatry [Internet]. 2021; Available from:  
209 <http://www.ncbi.nlm.nih.gov/pubmed/33836148>
- 210
- 211

212

**Table 1.** Demographic and clinical characteristics (N[%] or Mean[SD]).

|                                              | <b>N=77</b><br><b>(Full Sample)</b> | <b>N= 45</b><br><b>(Patients with</b><br><b>discharge</b><br><b>MoCA)</b> | <b>N=32</b><br><b>(Patients without</b><br><b>a discharge</b><br><b>MoCA)</b> |
|----------------------------------------------|-------------------------------------|---------------------------------------------------------------------------|-------------------------------------------------------------------------------|
| Gender                                       |                                     |                                                                           |                                                                               |
| Male                                         | 49 (63.6%)                          | 30 (66.7%)                                                                | 19 (59.4%)                                                                    |
| Female                                       | 28 (36.4%)                          | 15 (33.3%)                                                                | 13 (40.6%)                                                                    |
| Age                                          | 61.03 (15.67)                       | 61.98 (14.11)                                                             | 59.69 (17.77)                                                                 |
| Independent Prior to Hospitalization         | 74 (96.1%)                          | 44 (97.8%)                                                                | 30 (93.8%)                                                                    |
| Acute hospitalization length of stay         | 37.03 (31.8)                        | 39.4 (34.11)                                                              | 33.69 (28.4)                                                                  |
| Inpatient rehabilitation unit length of stay | 13.43 (6.47)                        | 14.44 (6.06)                                                              | 12 (6.84)                                                                     |
| Documented delirium                          | 44 (57.1%)                          | 28 (62.2%)                                                                | 16 (50%)                                                                      |
| Intubated                                    | 59 (76.6%)                          | 35 (77.8%)                                                                | 24 (75%)                                                                      |
| Intubation length                            | 13.31 (10.53)                       | 13.75 (10.03)                                                             | 12.67 (11.37)                                                                 |
| Documented hypoxia                           | 69 (89.6%)                          | 39 (86.7%)                                                                | 30 (93.8%)                                                                    |
| History of neurological diagnosis            | 2 (2.6%)                            | 1 (2.2%)                                                                  | 1 (3.1%)                                                                      |
| Initial MoCA scores                          | 20.29 (5.47)                        | 17.96 (4.71)                                                              | 23.47 (5.06)                                                                  |
| Discharge MoCA scores                        |                                     | 22.02 (4.23)                                                              |                                                                               |
| Initial QI-SC score                          | 25.75 (6.21)                        | 24.96 (4.94)                                                              | 26.88 (7.59)                                                                  |
| Discharge QI-SC score                        | 36.57 (8.37)                        | 37.11 (6.97)                                                              | 35.81 (10.09)                                                                 |

213 **Figure 1.** Mean scores on the MoCA and QI-SC at admission and discharge in N=45 patients  
214 with full data. Error bars represent SEM.

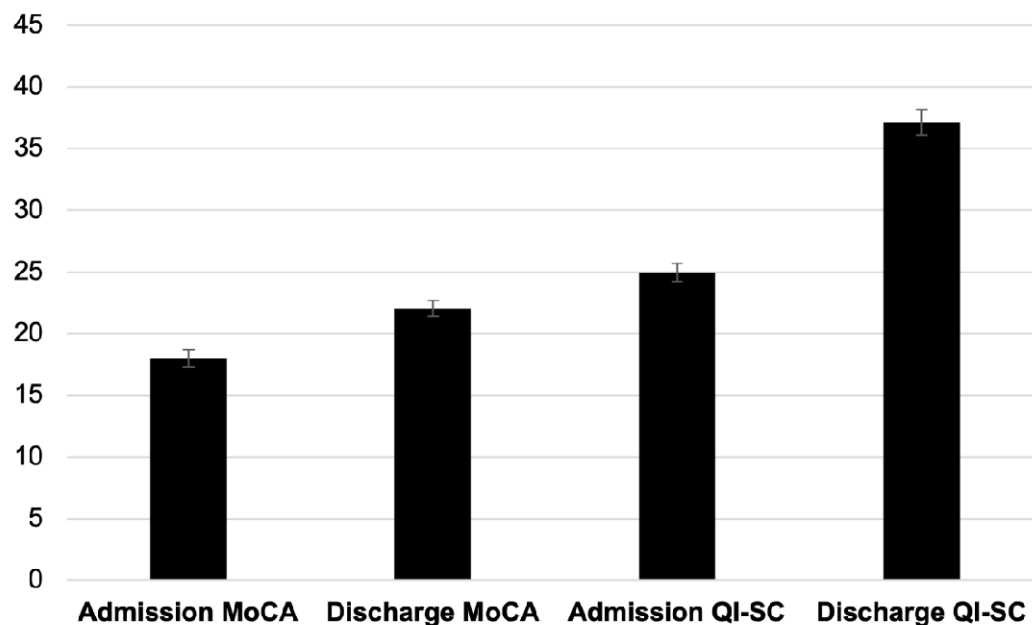

215

216

217

218 **Figure 2.** Change in functional self-care ability by clinically meaningful cognitive improvement.

219 Error bars represent SEM.

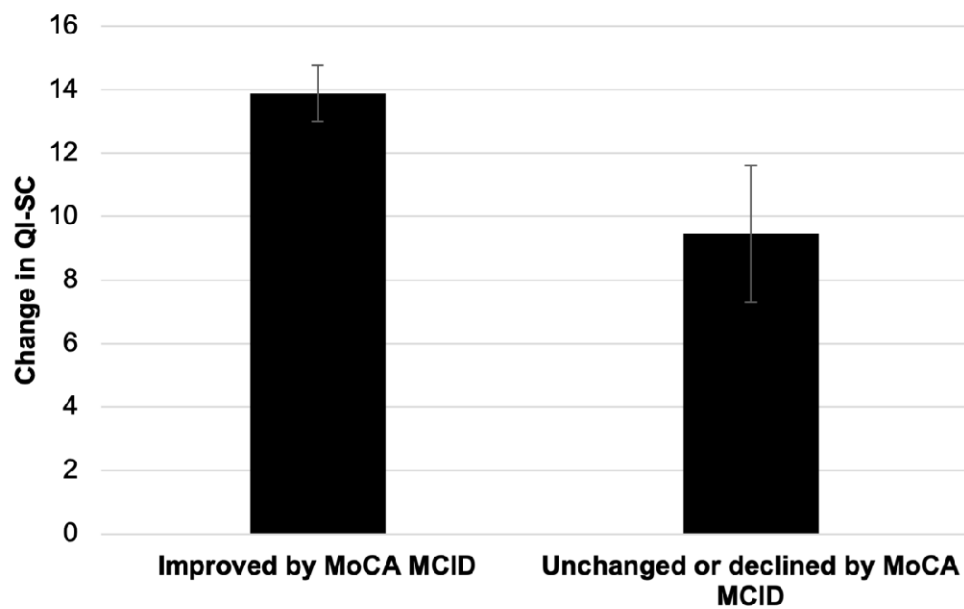

220

221
